# Supplementary material
Source: Springer Nature journal article supplement (https://www.springermedizin.de/resource/supplementary/12889_2008_1850_MOESM1_ESM.pdf/9504180)
Supplement: MOESM1 [file 9504180]

| <b>Division</b>    | <b>Total cases* from 1991 through 2004</b> | <b>Elderly population (≥ 65 yo)†</b> | <b>Annual rate (/1,000,000 elderly)</b> | <b>Temporal fluctuation ‡</b> |
|--------------------|--------------------------------------------|--------------------------------------|-----------------------------------------|-------------------------------|
| New England        | 1,639                                      | 1,891,629                            | 61.9                                    |                               |
| Middle Atlantic    | 4,307                                      | 5,480,653                            | 56.1                                    |                               |
| East North Central | 4,116                                      | 5,682,184                            | 51.7                                    |                               |
| West North Central | 1,874                                      | 2,576,891                            | 52.0                                    |                               |
| South Atlantic     | 5,975                                      | 6,887,412                            | 62.0                                    |                               |
| East South Central | 2,290                                      | 2,131,425                            | 76.7                                    |                               |
| West South Central | 3,677                                      | 3,419,419                            | 76.8                                    |                               |
| Mountain           | 1,270                                      | 2,029,846                            | 44.7                                    |                               |
| Pacific §          | 2,802                                      | 4,695,983                            | 42.6                                    |                               |
| Contiguous U.S.    | 27,950                                     | 34,795,442                           | 57.4                                    |                               |
